# Supplementary figures and images for: Global and regional sea surface temperature trends during Marine Isotope Stage 11
Source: Copernicus journal article supplement (doi:10.5194/cp-9-2231-2013), 2013-10-02

All data (N=52)

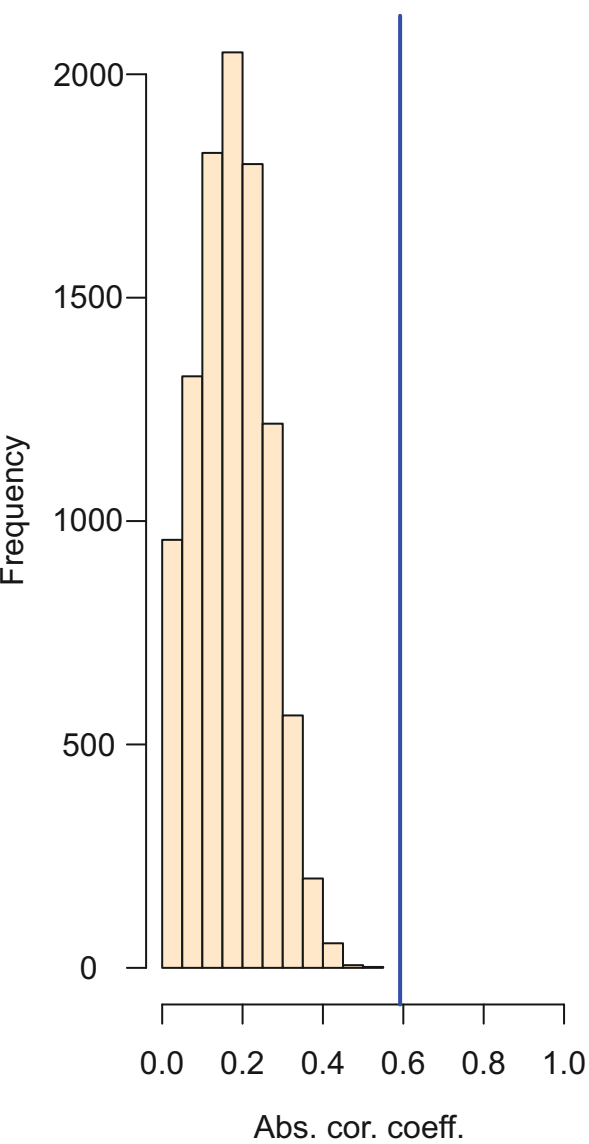

Data Subset (N = 30)

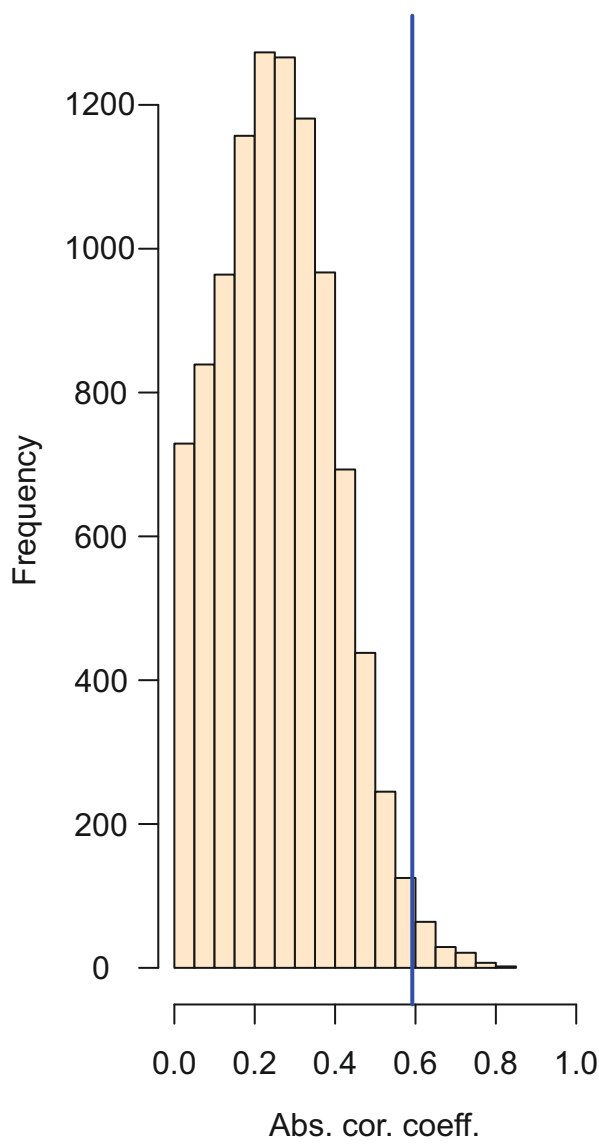

Supplement: Supplementary file 1 [file Fig.S4.pdf › supplement/Fig.S4.pdf]

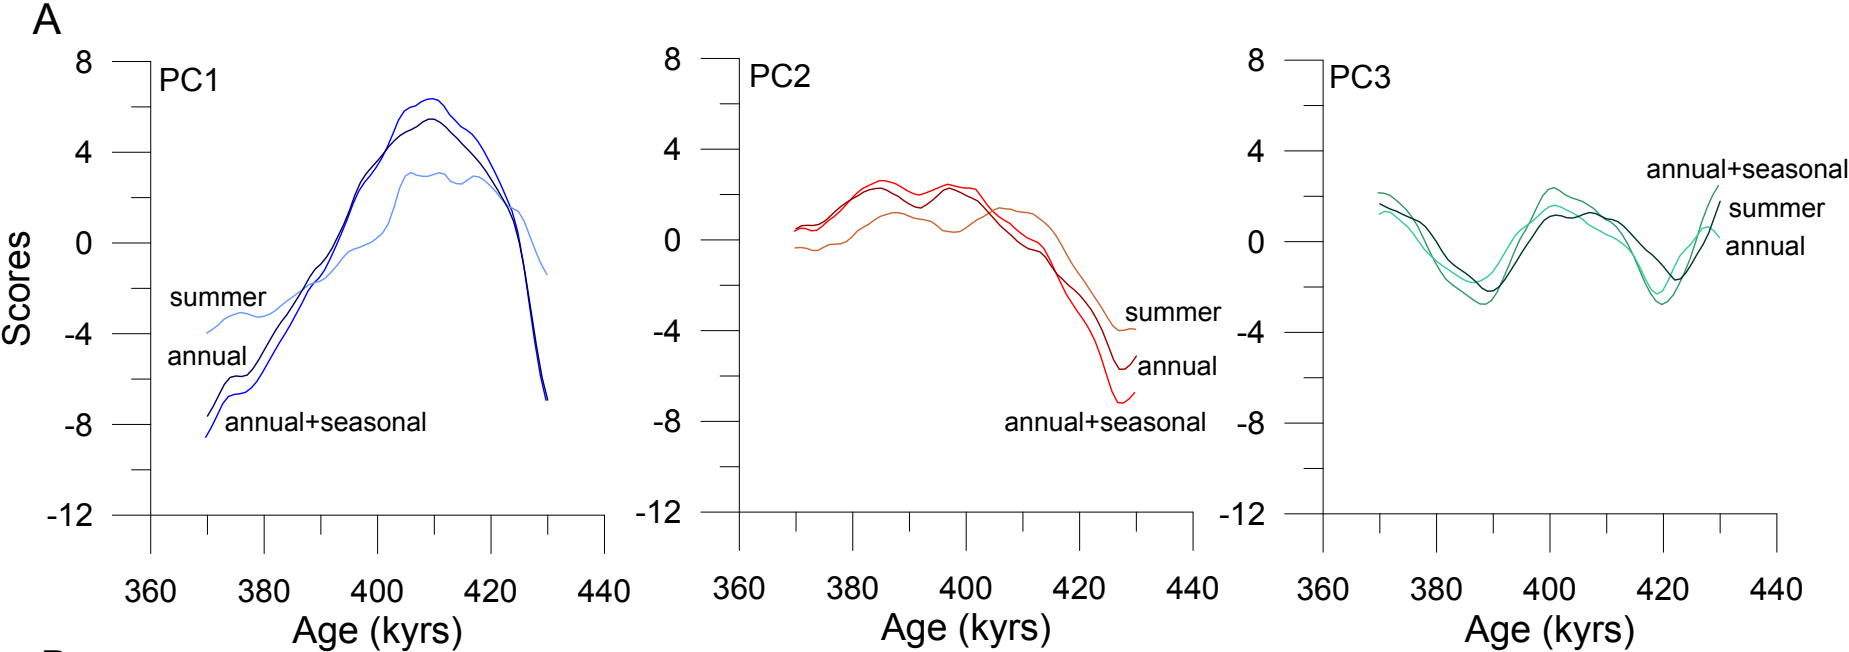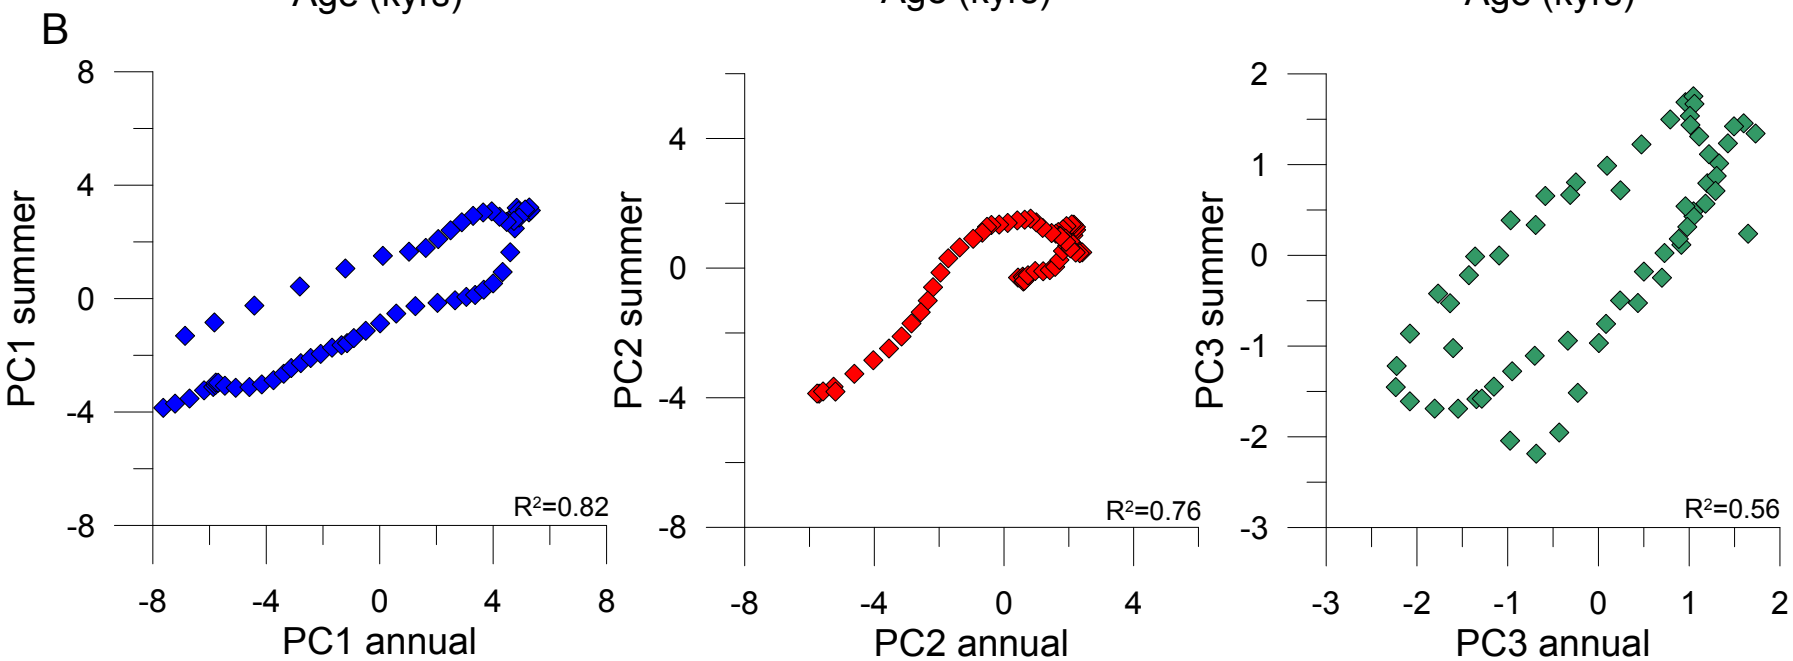

Supplement: Supplementary file 2 [file fig.S1.pdf › supplement/fig.S1.pdf]

A: Annual records

B: Summer records

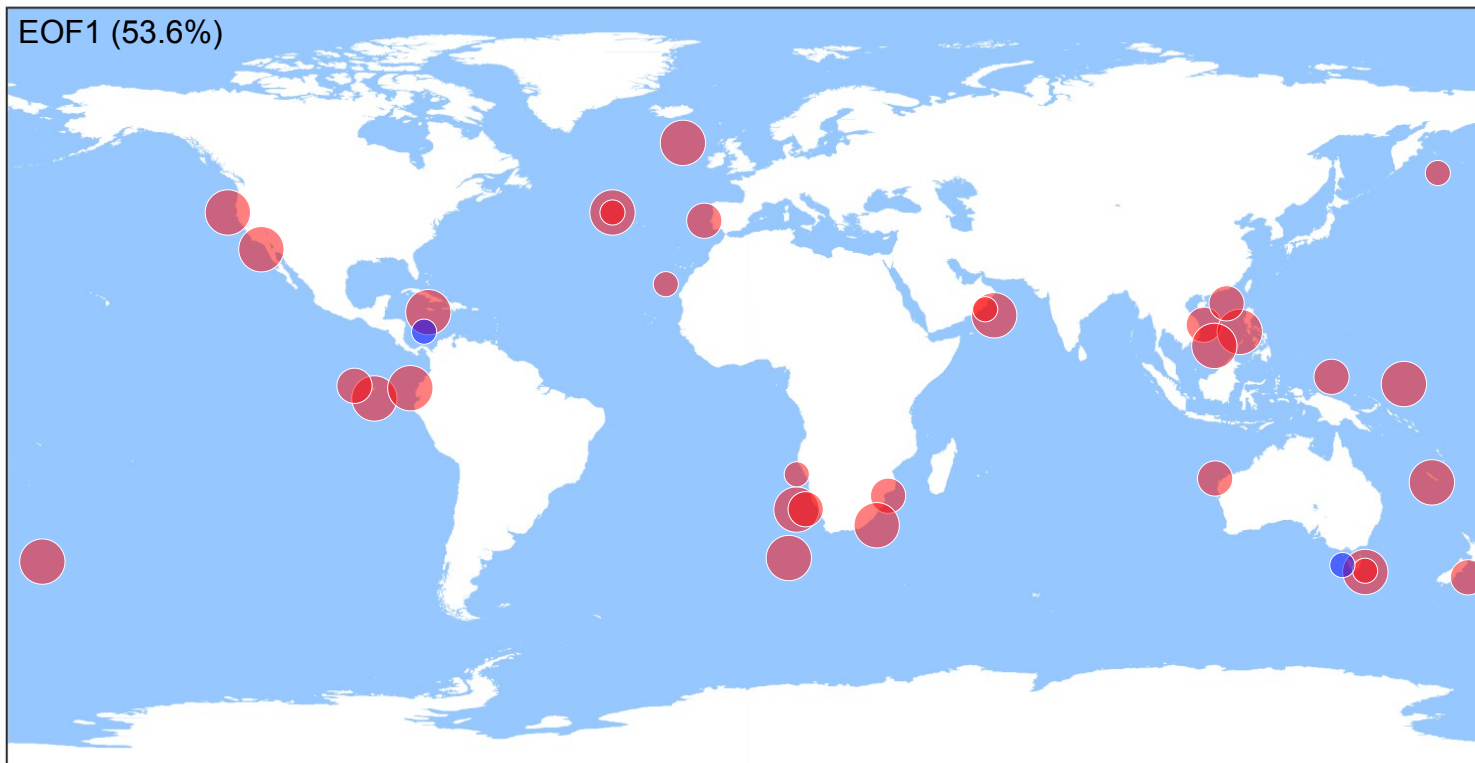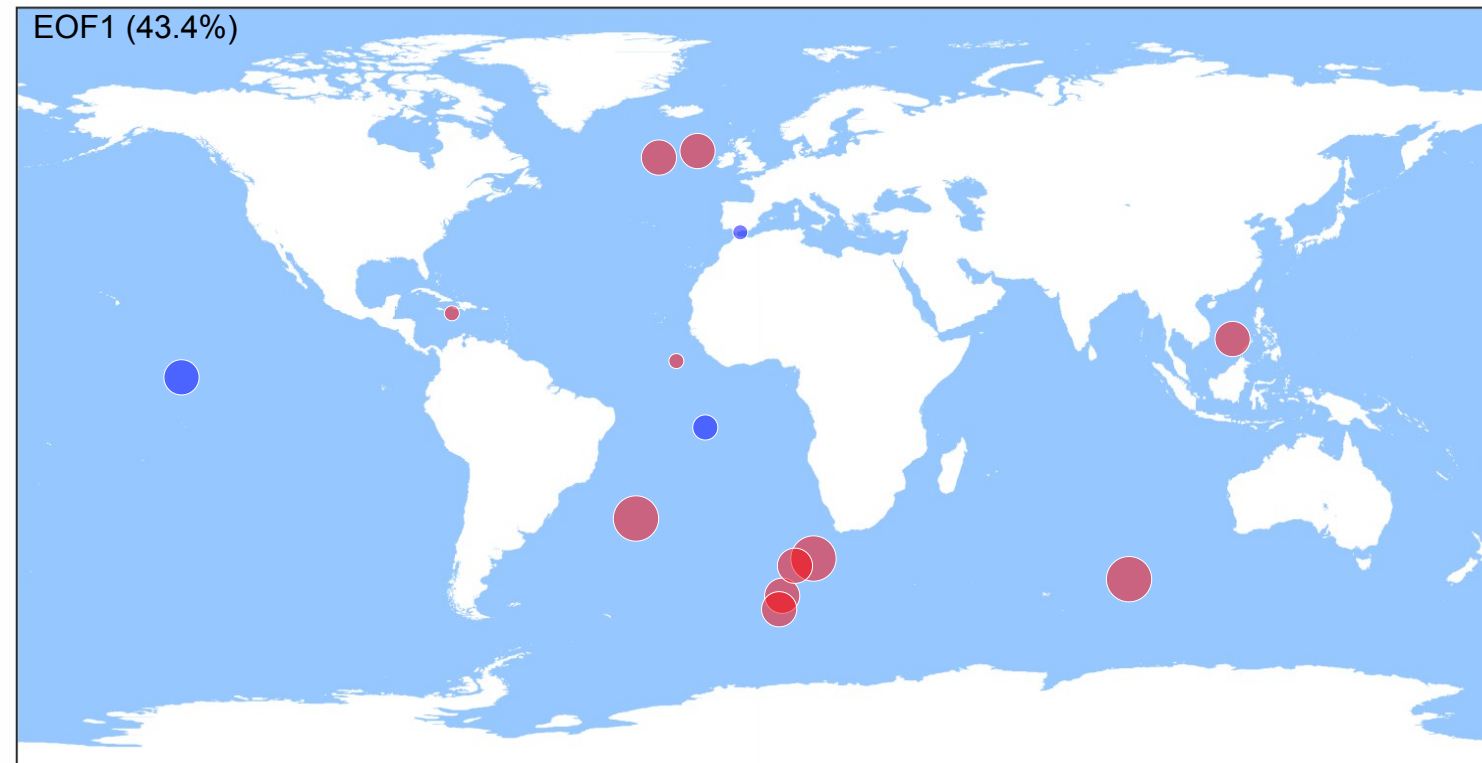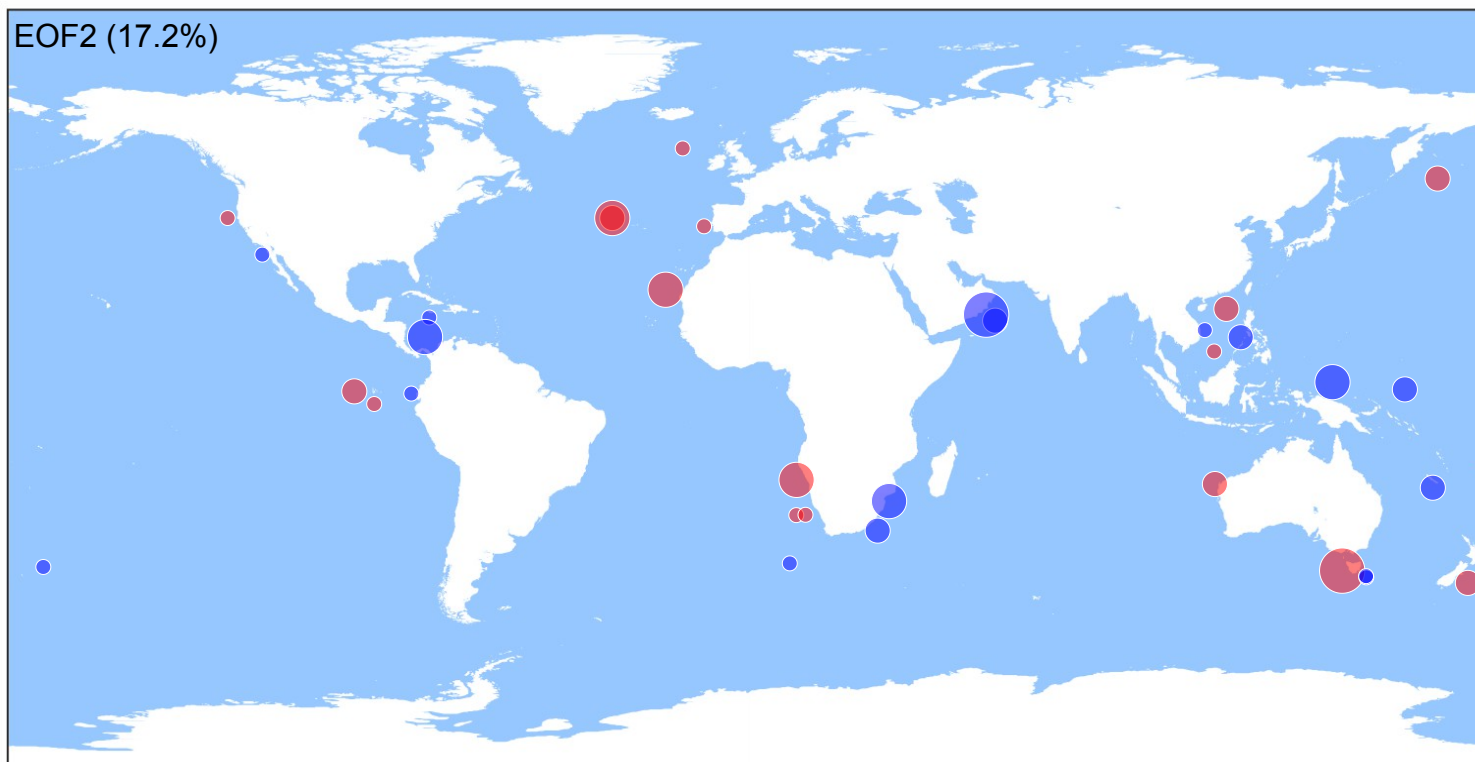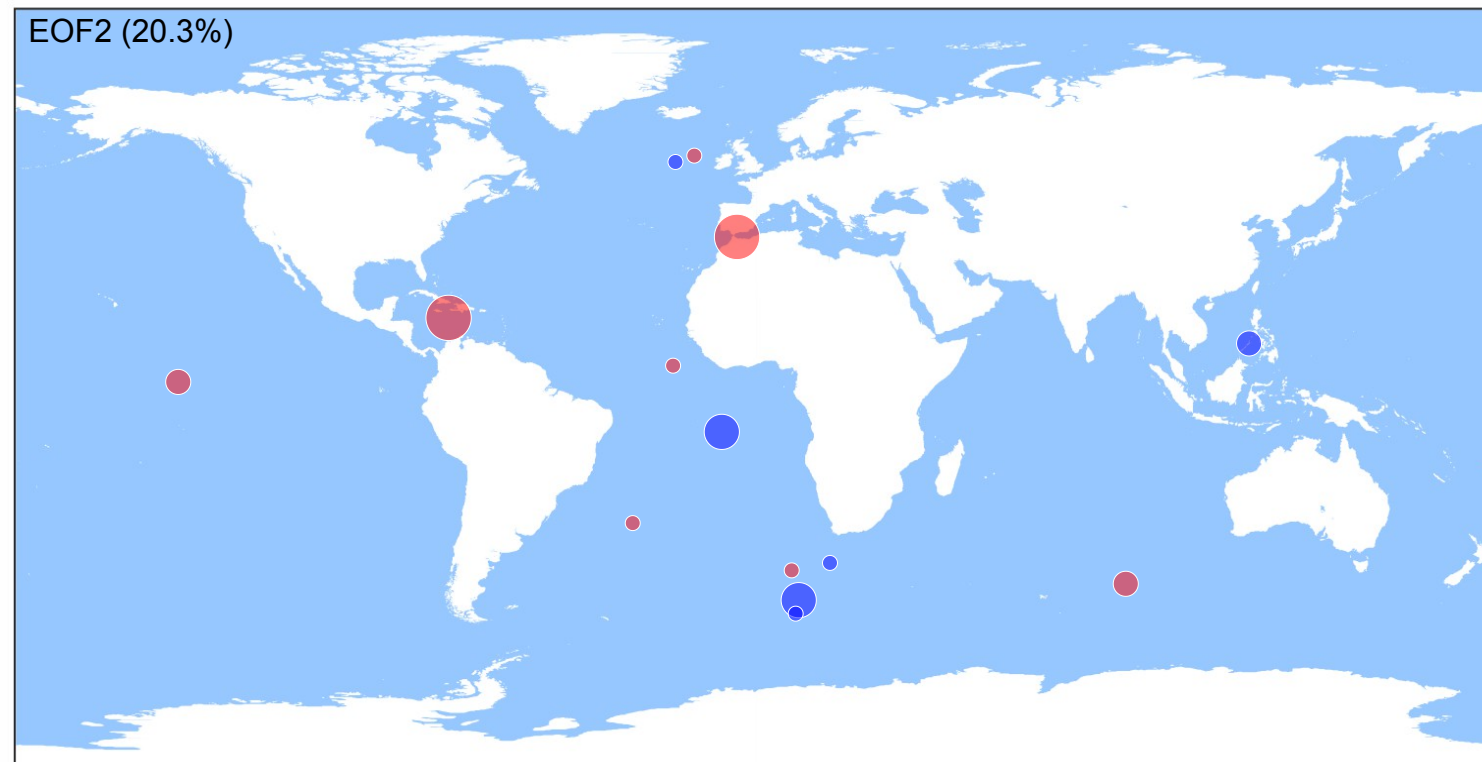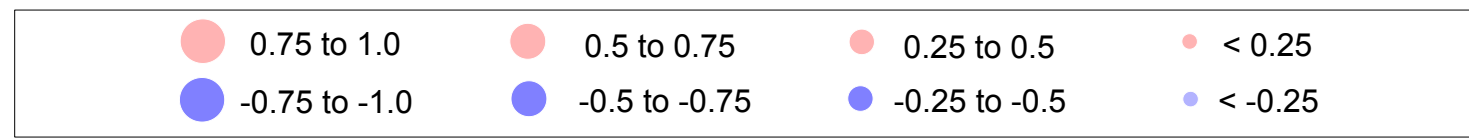

Supplement: Supplementary file 3 [file fig.S2.pdf › supplement/fig.S2.pdf]

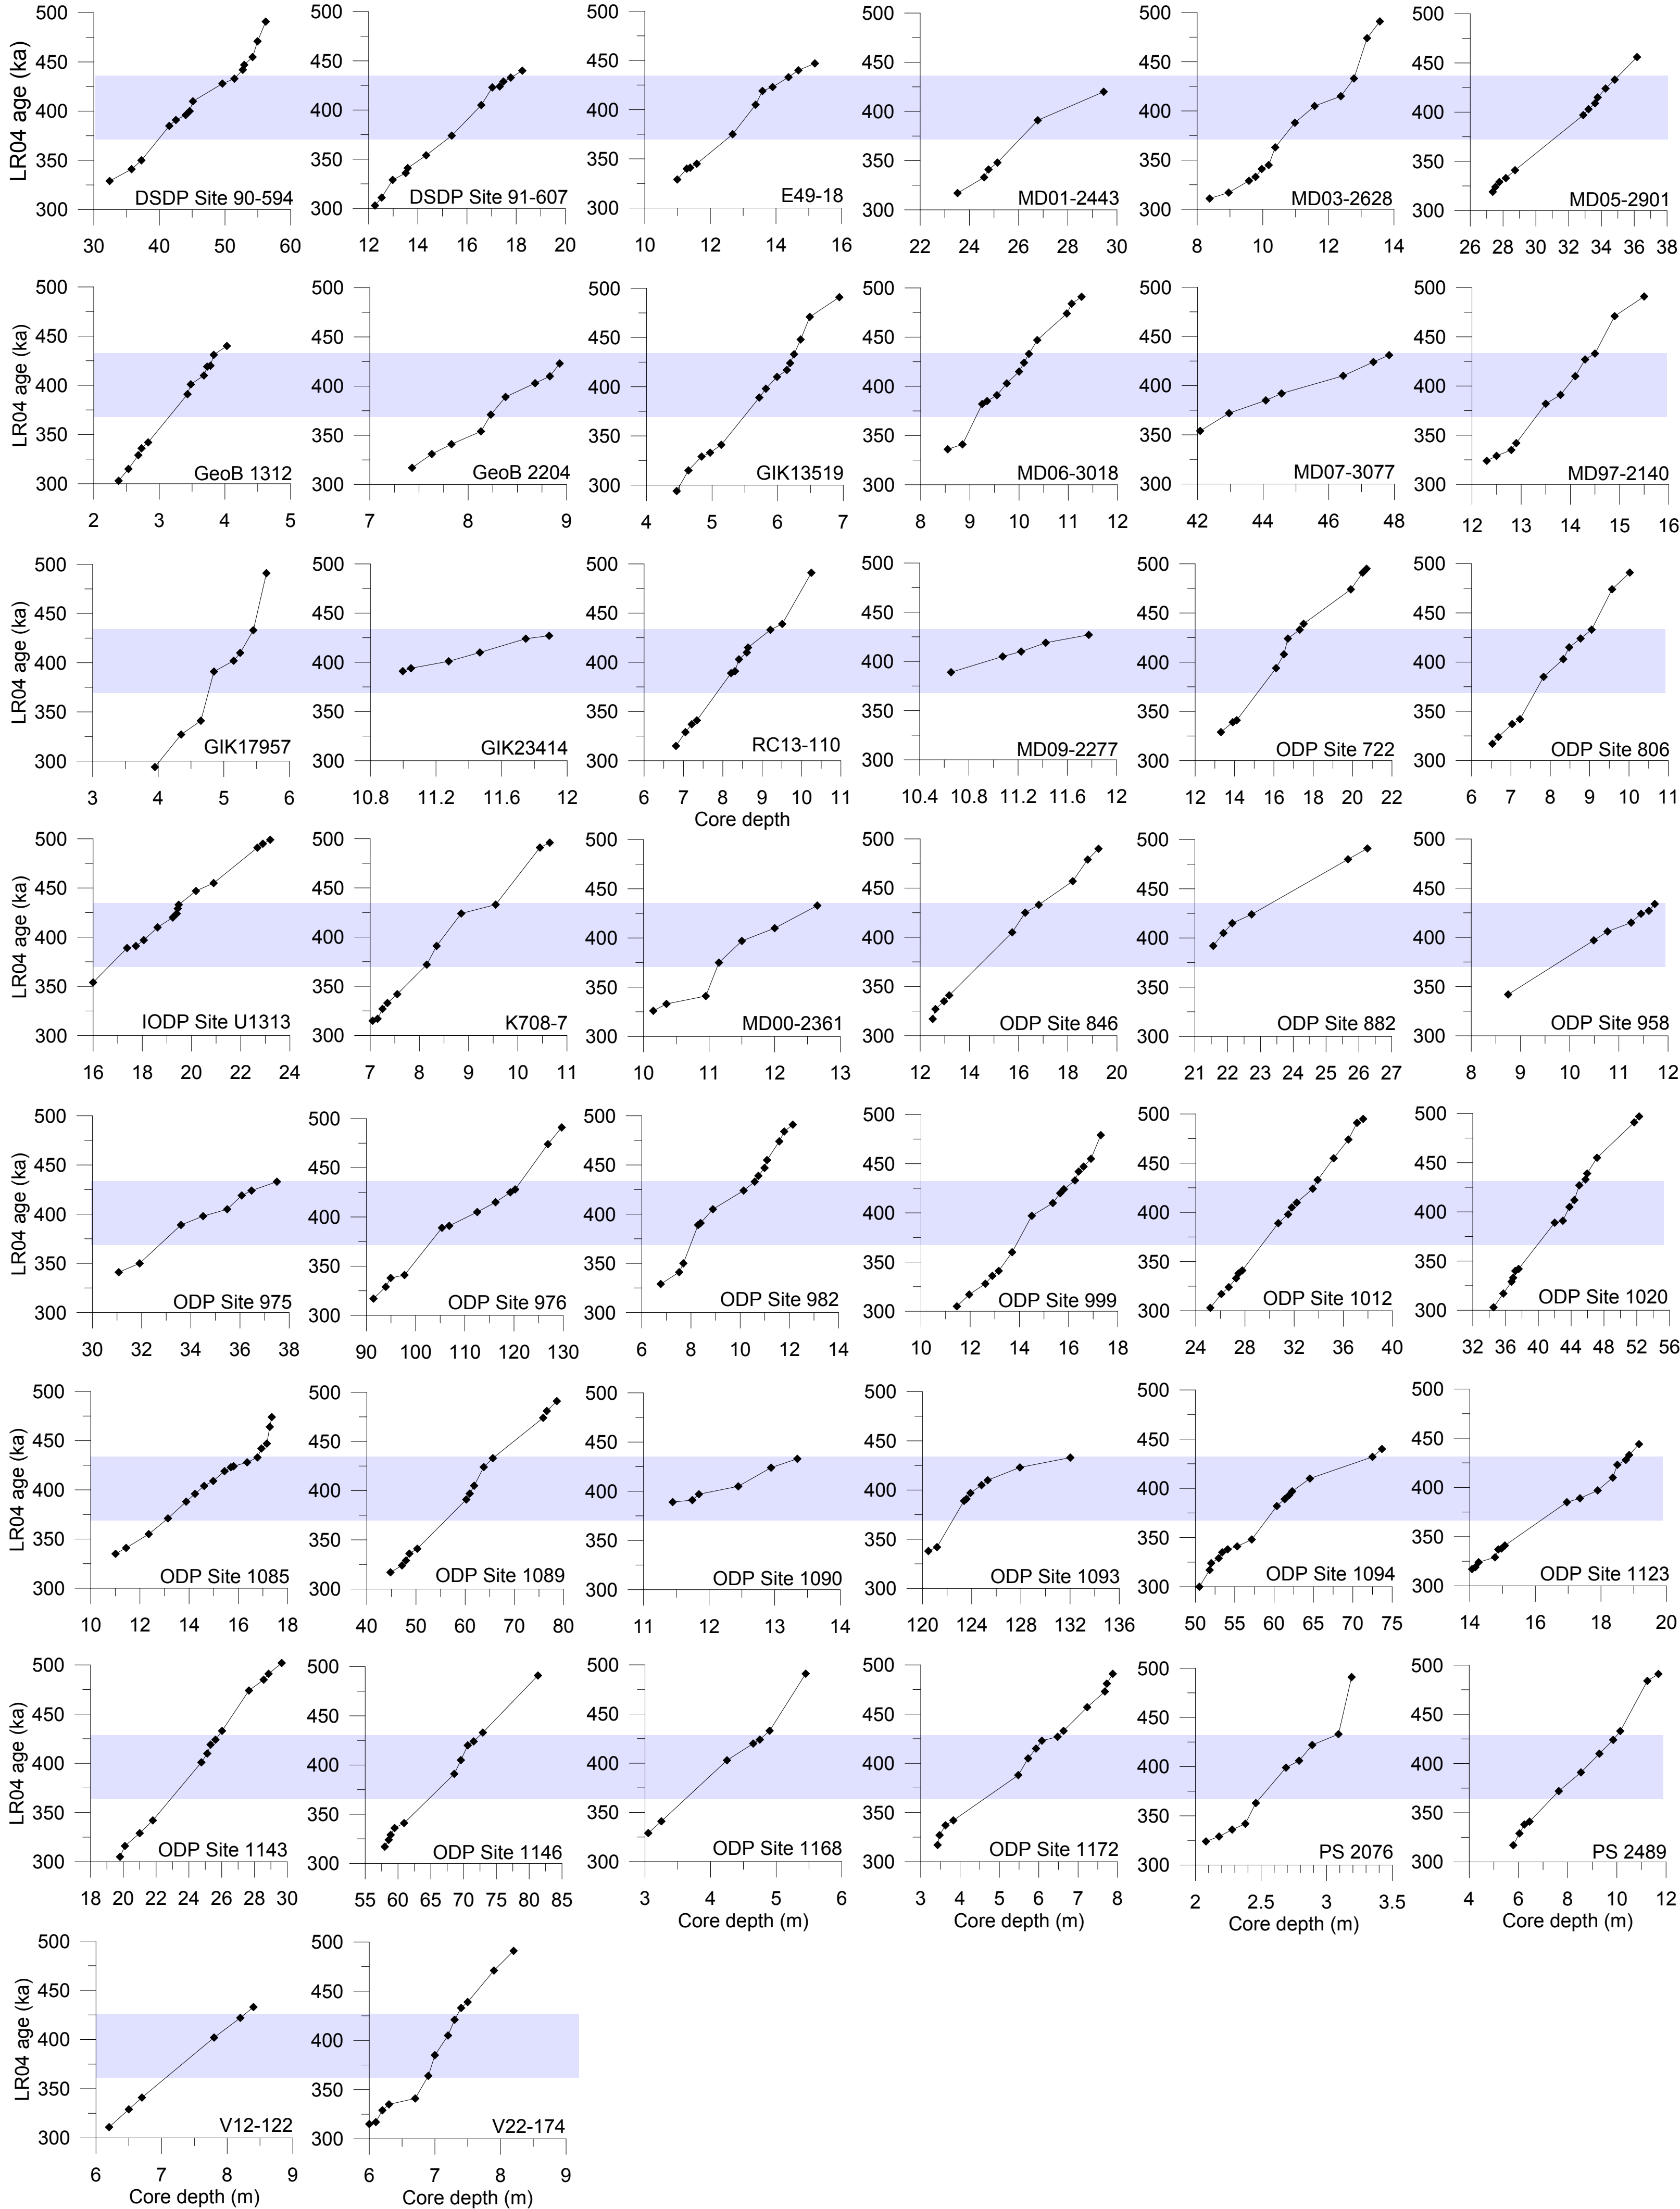

Supplement: Supplementary file 4 [file fig.S3.pdf › supplement/fig.S3.pdf]
